# Supplementary material for: Red Wine Age Estimation by the Alteration of Its Color Parameters: Fourier Transform Infrared Spectroscopy as a Tool to Monitor Wine Maturation Time
Source: Hindawi journal article supplement (doi:10.1155/2017/5767613), 2017-01-01

Table 1. Actual and predicted values of Chemical age index (i) for Kotsifali samples

| Sample ID | Usage       | Actual | Calculated |
|-----------|-------------|--------|------------|
| 1         | Calibration | 0,189  | 0,212      |
| 2         | Validation  | 0,48   | 0,431      |
| 3         | Calibration | 0,279  | 0,315      |
| 4         | Calibration | 0,384  | 0,331      |
| 5         | Validation  | 0,488  | 0,4        |
| 6         | Calibration | 0,747  | 0,613      |
| 7         | Calibration | 0,192  | 0,152      |
| 8         | Calibration | 0,474  | 0,443      |
| 9         | Calibration | 0,403  | 0,358      |
| 10        | Validation  | 0,501  | 0,361      |
| 11        | Validation  | 0,585  | 0,369      |
| 12        | Validation  | 0,613  | 0,447      |
| 13        | Calibration | 0,2    | 0,154      |
| 14        | Calibration | 0,458  | 0,472      |
| 15        | Calibration | 0,288  | 0,327      |
| 16        | Calibration | 0,326  | 0,355      |
| 17        | Calibration | 0,405  | 0,456      |
| 18        | Calibration | 0,466  | 0,492      |
| 19        | Calibration | 0,182  | 0,22       |
| 20        | Calibration | 0,438  | 0,459      |
| 21        | Calibration | 0,383  | 0,363      |
| 22        | Calibration | 0,454  | 0,435      |
| 23        | Calibration | 0,53   | 0,479      |
| 24        | Calibration | 0,544  | 0,546      |
| 25        | Calibration | 0,197  | 0,265      |
| 26        | Calibration | 0,437  | 0,436      |
| 27        | Calibration | 0,289  | 0,241      |
| 28        | Calibration | 0,362  | 0,392      |
| 29        | Calibration | 0,422  | 0,423      |
| 30        | Calibration | 0,489  | 0,522      |
| 31        | Calibration | 0,187  | 0,152      |
| 32        | Validation  | 0,41   | 0,415      |
| 33        | Calibration | 0,354  | 0,409      |
| 34        | Calibration | 0,433  | 0,456      |
| 35        | Validation  | 0,488  | 0,384      |
| 36        | Calibration | 0,54   | 0,555      |
| 73        | Calibration | 0,615  | 0,63       |
| 74        | Validation  | 0,624  | 0,556      |
| 75        | Validation  | 0,492  | 0,61       |
| 76        | Calibration | 0,484  | 0,458      |
| 77        | Calibration | 0,466  | 0,466      |
| 78        | Calibration | 0,401  | 0,428      |

Table 2. Actual and predicted values of Chemical age index (i) for Mandilari samples

| Sample ID | Usage       | Actual | Calculated |
|-----------|-------------|--------|------------|
| 37        | Calibration | 0,52   | 0,506      |
| 38        | Calibration | 0,762  | 0,651      |
| 39        | Calibration | 0,352  | 0,379      |
| 40        | Calibration | 0,435  | 0,471      |
| 41        | Calibration | 0,524  | 0,443      |
| 42        | Calibration | 0,634  | 0,625      |
| 43        | Calibration | 0,298  | 0,339      |
| 44        | Calibration | 0,597  | 0,681      |
| 45        | Calibration | 0,349  | 0,302      |
| 46        | Calibration | 0,453  | 0,442      |
| 47        | Calibration | 0,513  | 0,474      |
| 48        | Validation  | 0,585  | 0,522      |
| 49        | Calibration | 0,378  | 0,493      |
| 50        | Validation  | 0,592  | 0,591      |
| 51        | Calibration | 0,351  | 0,37       |
| 52        | Calibration | 0,425  | 0,396      |
| 53        | Validation  | 0,483  | 0,498      |
| 54        | Calibration | 0,519  | 0,495      |
| 55        | Calibration | 0,374  | 0,434      |
| 56        | Calibration | 0,578  | 0,651      |
| 57        | Calibration | 0,354  | 0,354      |
| 58        | Calibration | 0,443  | 0,451      |
| 59        | Calibration | 0,491  | 0,455      |
| 60        | Calibration | 0,506  | 0,511      |
| 61        | Calibration | 0,373  | 0,415      |
| 62        | Calibration | 0,559  | 0,468      |
| 63        | Calibration | 0,341  | 0,336      |
| 64        | Validation  | 0,41   | 0,465      |
| 65        | Validation  | 0,487  | 0,487      |
| 66        | Calibration | 0,505  | 0,523      |
| 67        | Calibration | 0,392  | 0,422      |
| 68        | Calibration | 0,625  | 0,576      |
| 69        | Calibration | 0,339  | 0,367      |
| 70        | Calibration | 0,44   | 0,422      |
| 71        | Calibration | 0,5    | 0,579      |
| 72        | Validation  | 0,56   | 0,531      |
| 79        | Validation  | 0,727  | 0,715      |
| 80        | Calibration | 0,649  | 0,651      |
| 81        | Validation  | 0,665  | 0,596      |
| 82        | Calibration | 0,628  | 0,577      |
| 83        | Calibration | 0,636  | 0,587      |
| 84        | Calibration | 0,633  | 0,629      |

Table 3. Actual and predicted values of Chemical age index (ii) for Kotsifali samples

| Sample ID | Usage       | Actual | Calculated |
|-----------|-------------|--------|------------|
| 1         | Validation  | 0,051  | 0,027      |
| 2         | Calibration | 0,118  | 0,135      |
| 3         | Calibration | 0,079  | 0,138      |
| 4         | Validation  | 0,107  | 0,122      |
| 5         | Calibration | 0,195  | 0,202      |
| 6         | Calibration | 0,472  | 0,32       |
| 7         | Validation  | 0,052  | -0,091     |
| 8         | Calibration | 0,125  | 0,148      |
| 9         | Calibration | 0,174  | 0,165      |
| 10        | Calibration | 0,2    | 0,144      |
| 11        | Calibration | 0,245  | 0,167      |
| 12        | Calibration | 0,289  | 0,28       |
| 13        | Calibration | 0,055  | 0,025      |
| 14        | Calibration | 0,143  | 0,181      |
| 15        | Calibration | 0,084  | 0,095      |
| 16        | Validation  | 0,09   | 0,139      |
| 17        | Calibration | 0,12   | 0,168      |
| 18        | Calibration | 0,168  | 0,25       |
| 19        | Calibration | 0,048  | 0,089      |
| 20        | Calibration | 0,122  | 0,118      |
| 21        | Calibration | 0,143  | 0,136      |
| 22        | Calibration | 0,161  | 0,177      |
| 23        | Calibration | 0,198  | 0,152      |
| 24        | Calibration | 0,247  | 0,255      |
| 25        | Calibration | 0,054  | 0,041      |
| 26        | Validation  | 0,113  | 0,24       |
| 27        | Calibration | 0,087  | 0,069      |
| 28        | Calibration | 0,099  | 0,122      |
| 29        | Validation  | 0,136  | 0,12       |
| 30        | Calibration | 0,18   | 0,207      |
| 31        | Calibration | 0,049  | 0,04       |
| 32        | Calibration | 0,108  | 0,069      |
| 33        | Calibration | 0,123  | 0,172      |
| 34        | Calibration | 0,144  | 0,168      |
| 35        | Calibration | 0,177  | 0,132      |
| 36        | Calibration | 0,246  | 0,286      |
| 73        | Calibration | 0,289  | 0,285      |
| 74        | Validation  | 0,308  | 0,299      |
| 75        | Calibration | 0,199  | 0,221      |
| 76        | Validation  | 0,173  | 0,119      |
| 77        | Calibration | 0,172  | 0,157      |
| 78        | Validation  | 0,136  | -0,025     |

Table 4. Actual and predicted values of Chemical age index (ii) for Mandilari samples

| Sample ID | Usage       | Actual | Calculated |
|-----------|-------------|--------|------------|
| 37        | Validation  | 0,291  | 0,318      |
| 38        | Calibration | 0,361  | 0,337      |
| 39        | Calibration | 0,123  | 0,136      |
| 40        | Calibration | 0,162  | 0,179      |
| 41        | Calibration | 0,223  | 0,204      |
| 42        | Calibration | 0,363  | 0,341      |
| 43        | Calibration | 0,099  | 0,13       |
| 44        | Calibration | 0,261  | 0,248      |
| 45        | Calibration | 0,145  | 0,115      |
| 46        | Calibration | 0,169  | 0,142      |
| 47        | Validation  | 0,213  | 0,175      |
| 48        | Calibration | 0,278  | 0,288      |
| 49        | Validation  | 0,155  | 0,207      |
| 50        | Validation  | 0,305  | 0,276      |
| 51        | Validation  | 0,129  | 0,136      |
| 52        | Calibration | 0,146  | 0,108      |
| 53        | Calibration | 0,181  | 0,201      |
| 54        | Calibration | 0,223  | 0,253      |
| 55        | Calibration | 0,159  | 0,202      |
| 56        | Calibration | 0,267  | 0,297      |
| 57        | Calibration | 0,13   | 0,112      |
| 58        | Validation  | 0,155  | 0,184      |
| 59        | Calibration | 0,195  | 0,164      |
| 60        | Validation  | 0,226  | 0,259      |
| 61        | Calibration | 0,154  | 0,185      |
| 62        | Calibration | 0,276  | 0,26       |
| 63        | Validation  | 0,121  | 0,096      |
| 64        | Calibration | 0,152  | 0,169      |
| 65        | Calibration | 0,192  | 0,204      |
| 66        | Validation  | 0,226  | 0,264      |
| 67        | Calibration | 0,164  | 0,145      |
| 68        | Calibration | 0,284  | 0,257      |
| 69        | Calibration | 0,118  | 0,137      |
| 70        | Calibration | 0,15   | 0,147      |
| 71        | Calibration | 0,194  | 0,251      |
| 72        | Calibration | 0,282  | 0,262      |
| 79        | Calibration | 0,492  | 0,487      |
| 80        | Calibration | 0,383  | 0,4        |
| 81        | Calibration | 0,385  | 0,367      |
| 82        | Calibration | 0,361  | 0,346      |
| 83        | Calibration | 0,365  | 0,354      |
| 84        | Calibration | 0,364  | 0,371      |

Figure 1. Predicted Residual Error Sum of Squares (PRESS) values and Root Mean Square Error of Validation (RMSECV) for each factor for Kotsifali Chemical age (i) prediction.

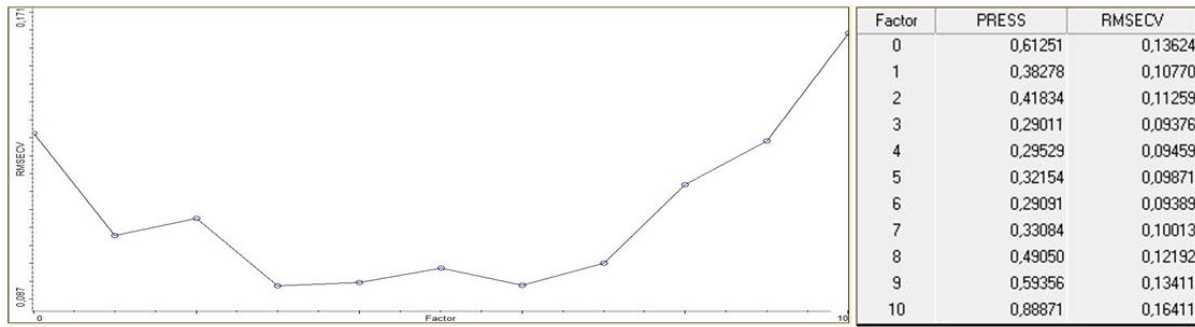

Figure 2. . Predicted Residual Error Sum of Squares (PRESS) values and Root Mean Square Error of Validation (RMSECV) for each factor for Mandilari Chemical age (i) prediction.

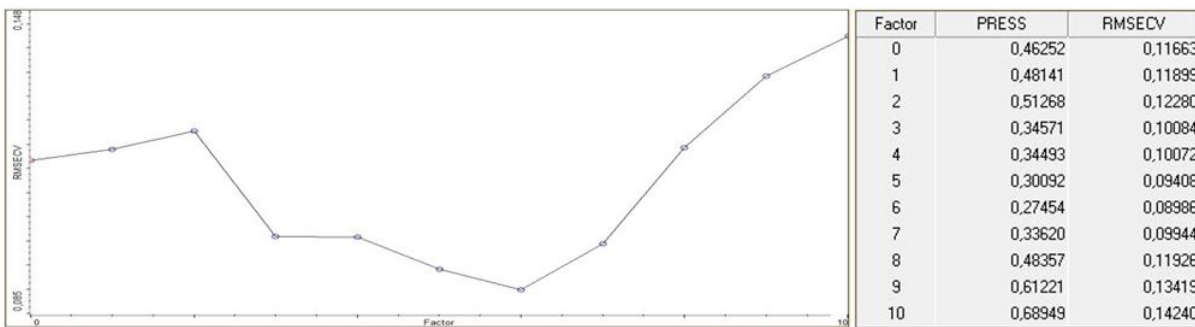

Figure 3. Predicted Residual Error Sum of Squares (PRESS) values and Root Mean Square Error of Validation (RMSECV) for each factor for Kotsifali Chemical age (ii) prediction.

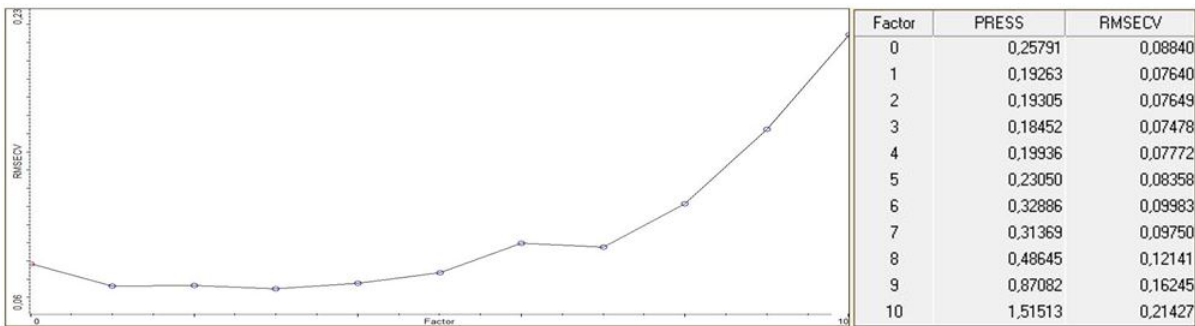

Figure 4. . Predicted Residual Error Sum of Squares (PRESS) values and Root Mean Square Error of Validation (RMSECV) for each factor for Mandilari Chemical age (ii) prediction.

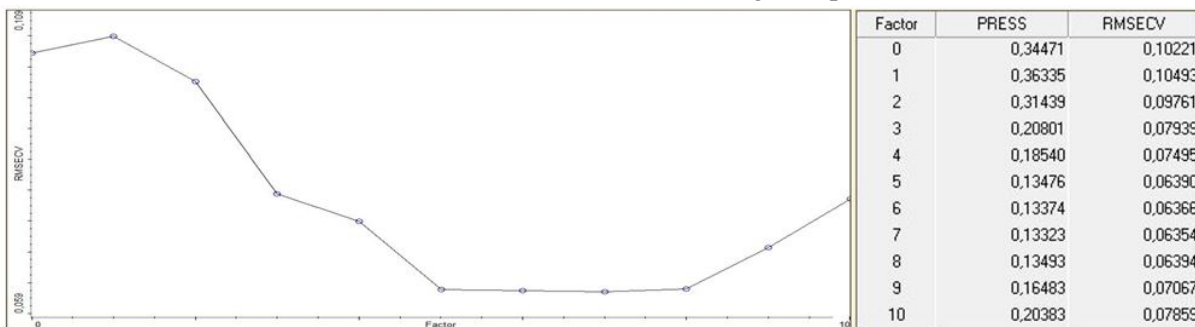

Supplement: f1 [file 5767613.f1.pdf]
